# Supplementary material for: Retrieving ground-level PM 2.5 concentrations in China (2013–2021) with a numerical-model-informed testbed to mitigate sample-imbalance-induced biases
Source: Copernicus journal article supplement (doi:10.5194/essd-16-3781-2024), 2024-08-27
Supplement: Supplementary file 1 [file essd-16-3781-2024-supplement.pdf]

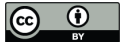

*Supplement of*

**Retrieving ground-level PM<sub>2.5</sub> concentrations in China (2013–2021)  
with a numerical-model-informed testbed to mitigate  
sample-imbalance-induced biases**

**Siwei Li et al.**

*Correspondence to:* Siwei Li (siwei.li@whu.edu.cn) and Jia Xing (jxing3@utk.edu)

The copyright of individual parts of the supplement might differ from the article licence.

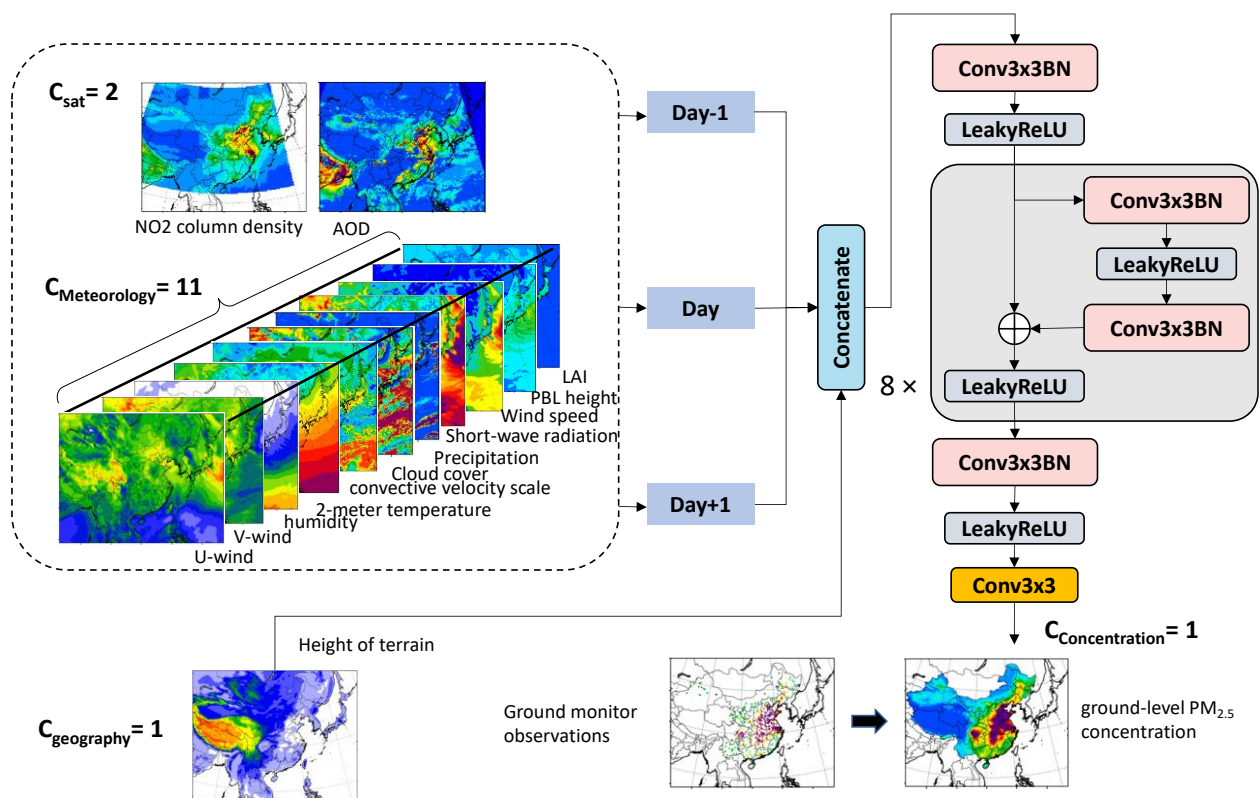

**Figure S1.** ResNet model structure

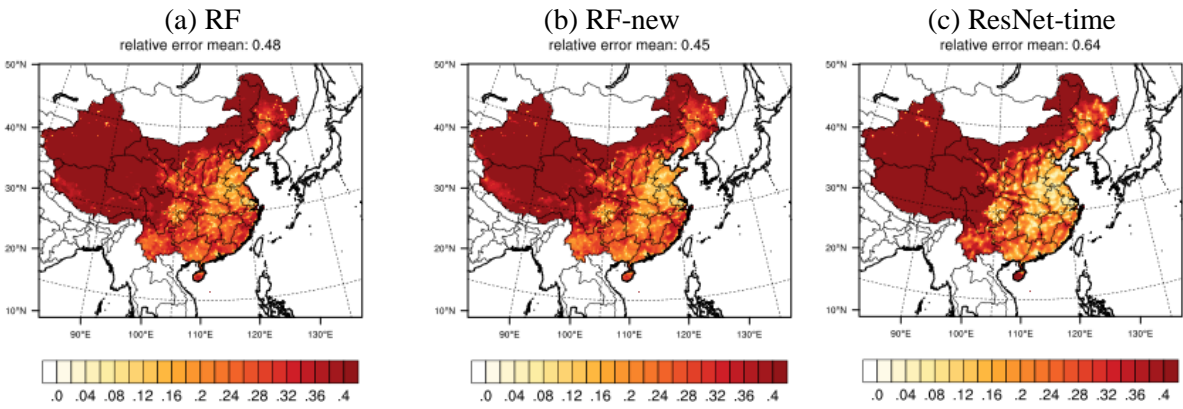

**Figure S2.** Comparison of relative errors in predicting ground-level PM<sub>2.5</sub> using RF, RF-new, and ResNet-time models with the testbed.

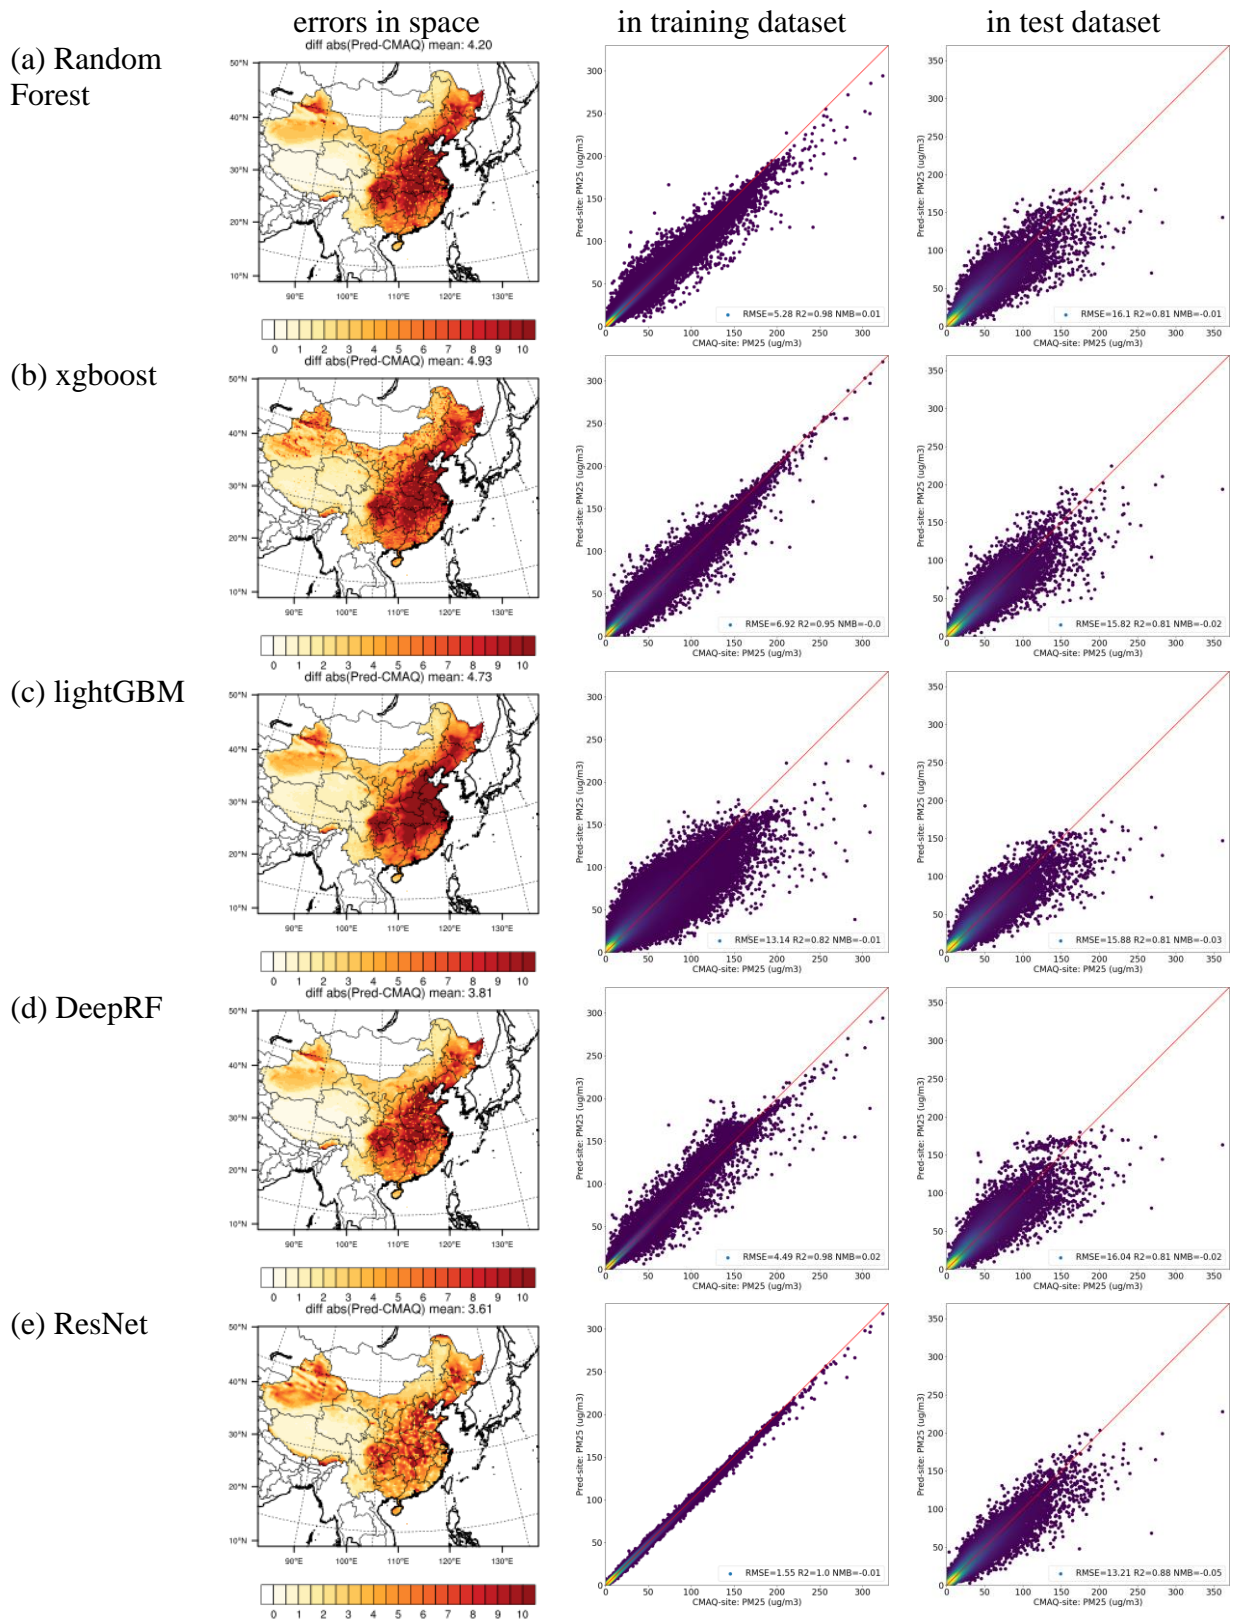

Figure S3. Errors in predicting surface PM<sub>2.5</sub> with monitor-located grids training models

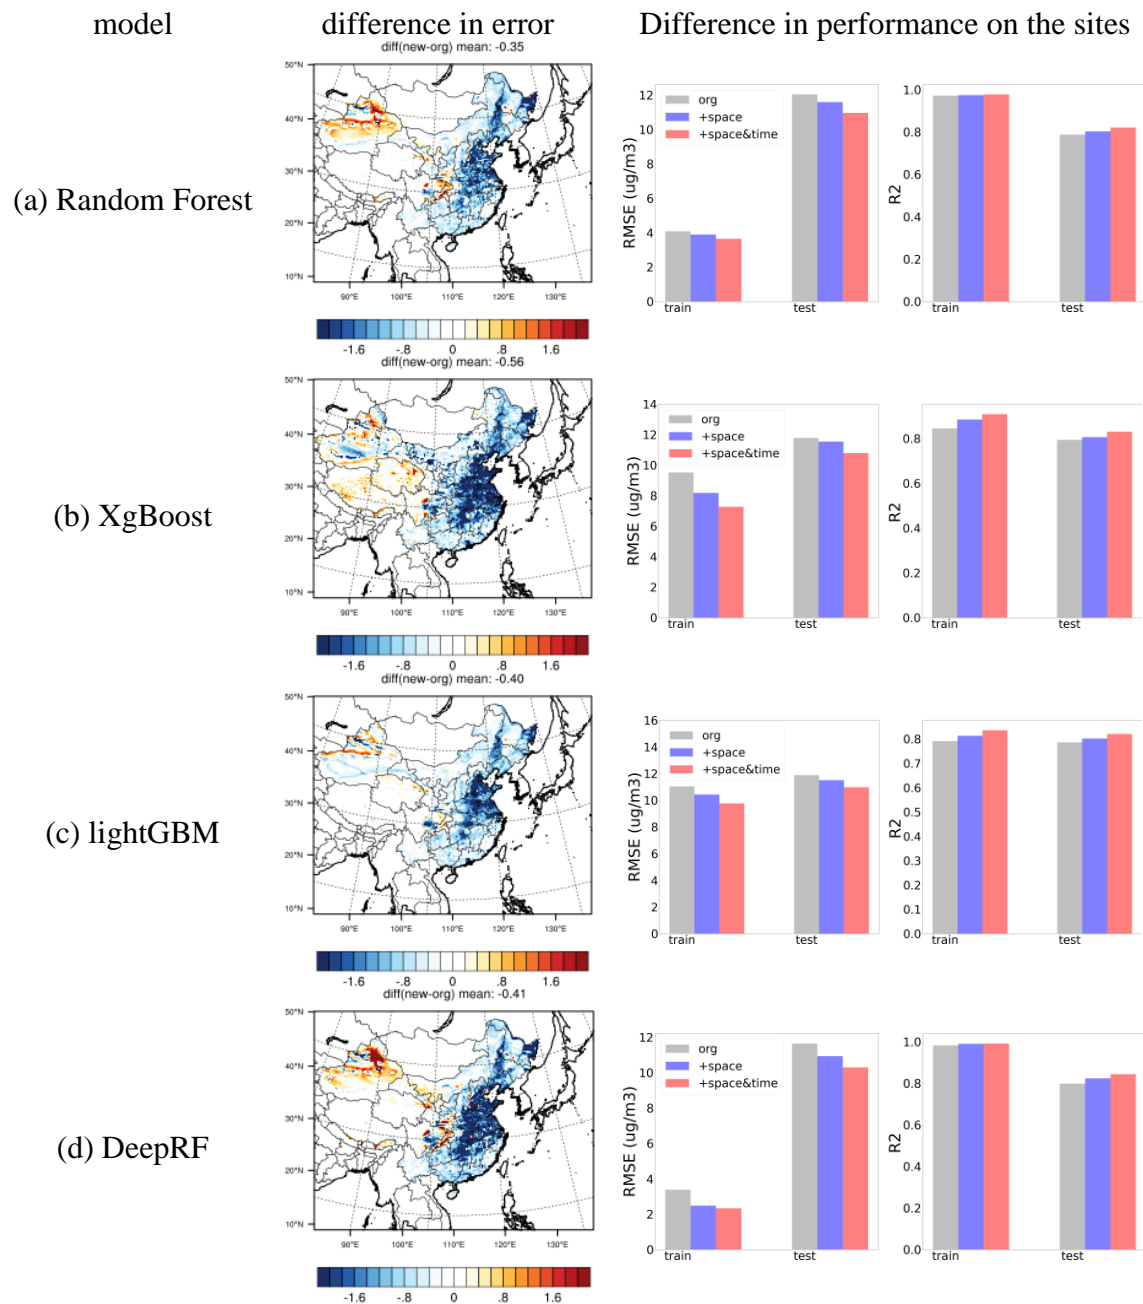

**Figure S4.** Improvement after implementing the features in surrounding grid cells (compared to each baseline model without spatiotemporal-neighbourhood features)

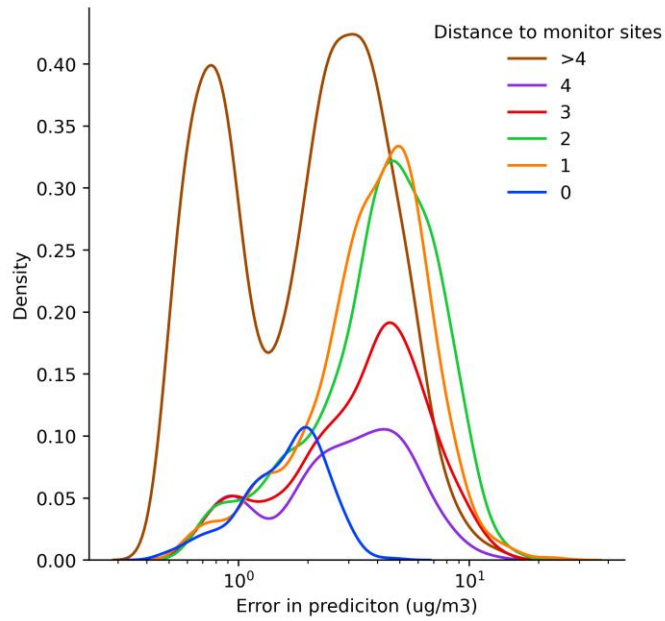

(a) by density

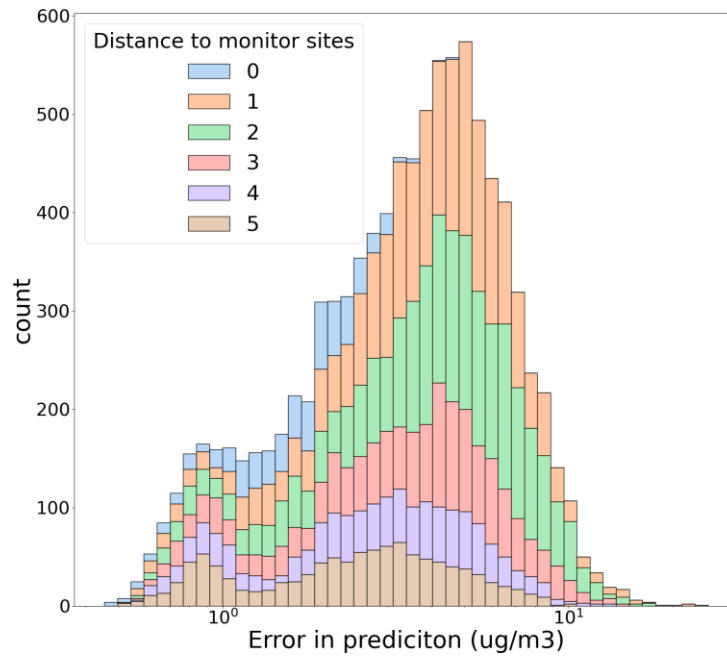

(b) by count

**Figure S5.** Error distribution across the distance to monitor sites (D-site) based on ResNet-time model

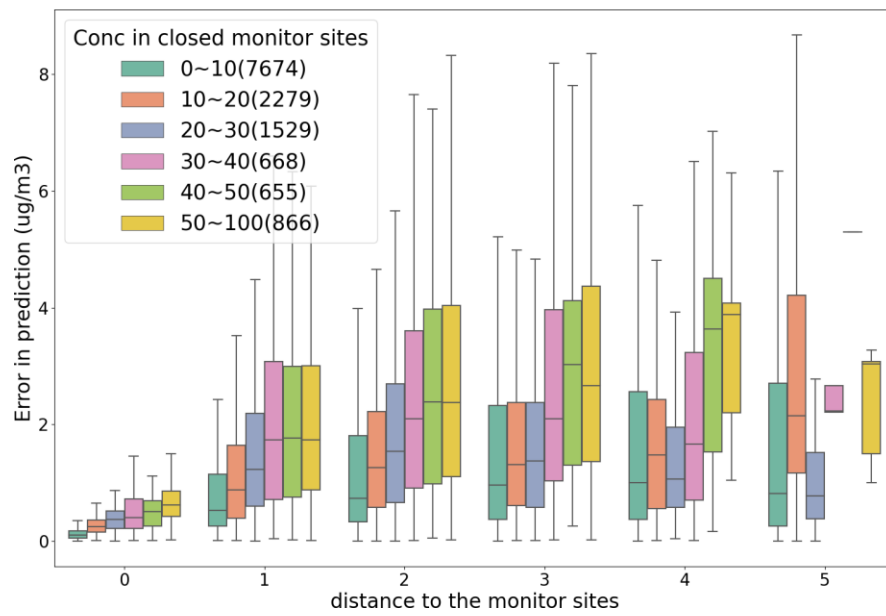

**Figure S6.** Error distribution across the monitor concentrations (B-conc) based on ResNet-time model



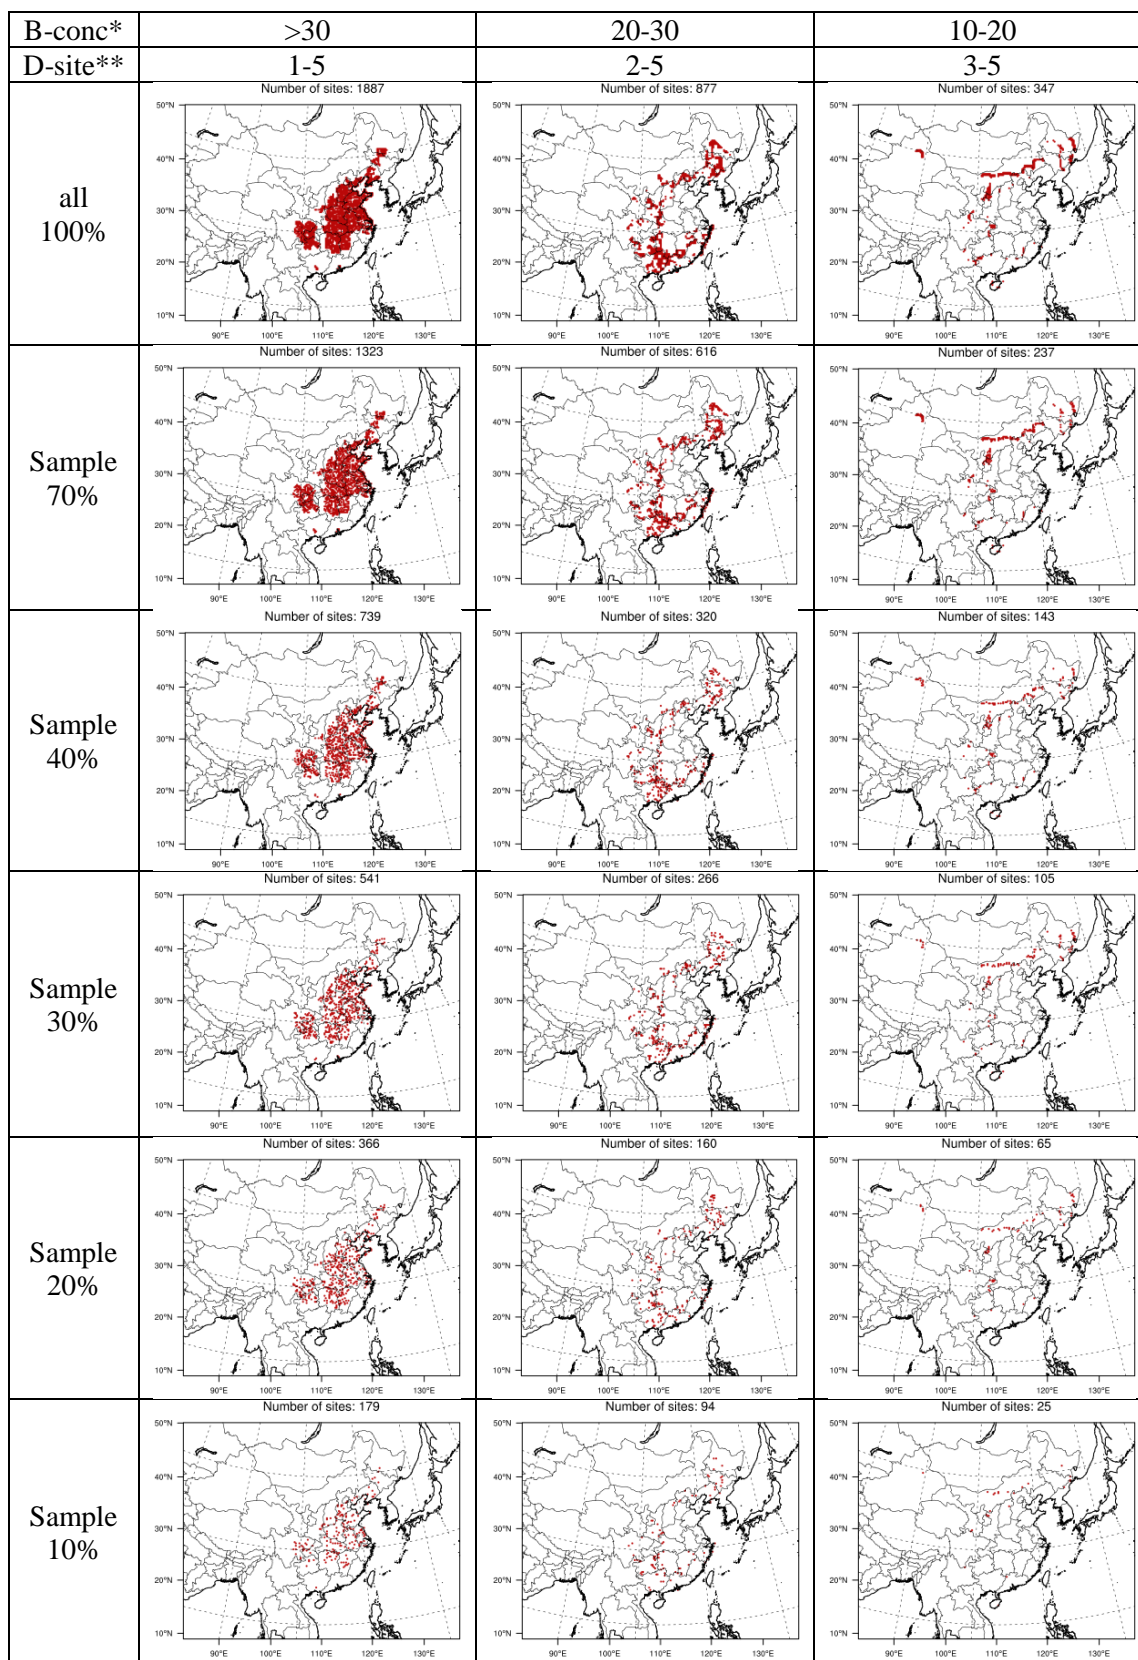

**Figure S7.** Spatial distribution of selected adding sites with certain levels of sampling (B-conc: conc in closed monitor sites; D-site: distance from monitor sites)



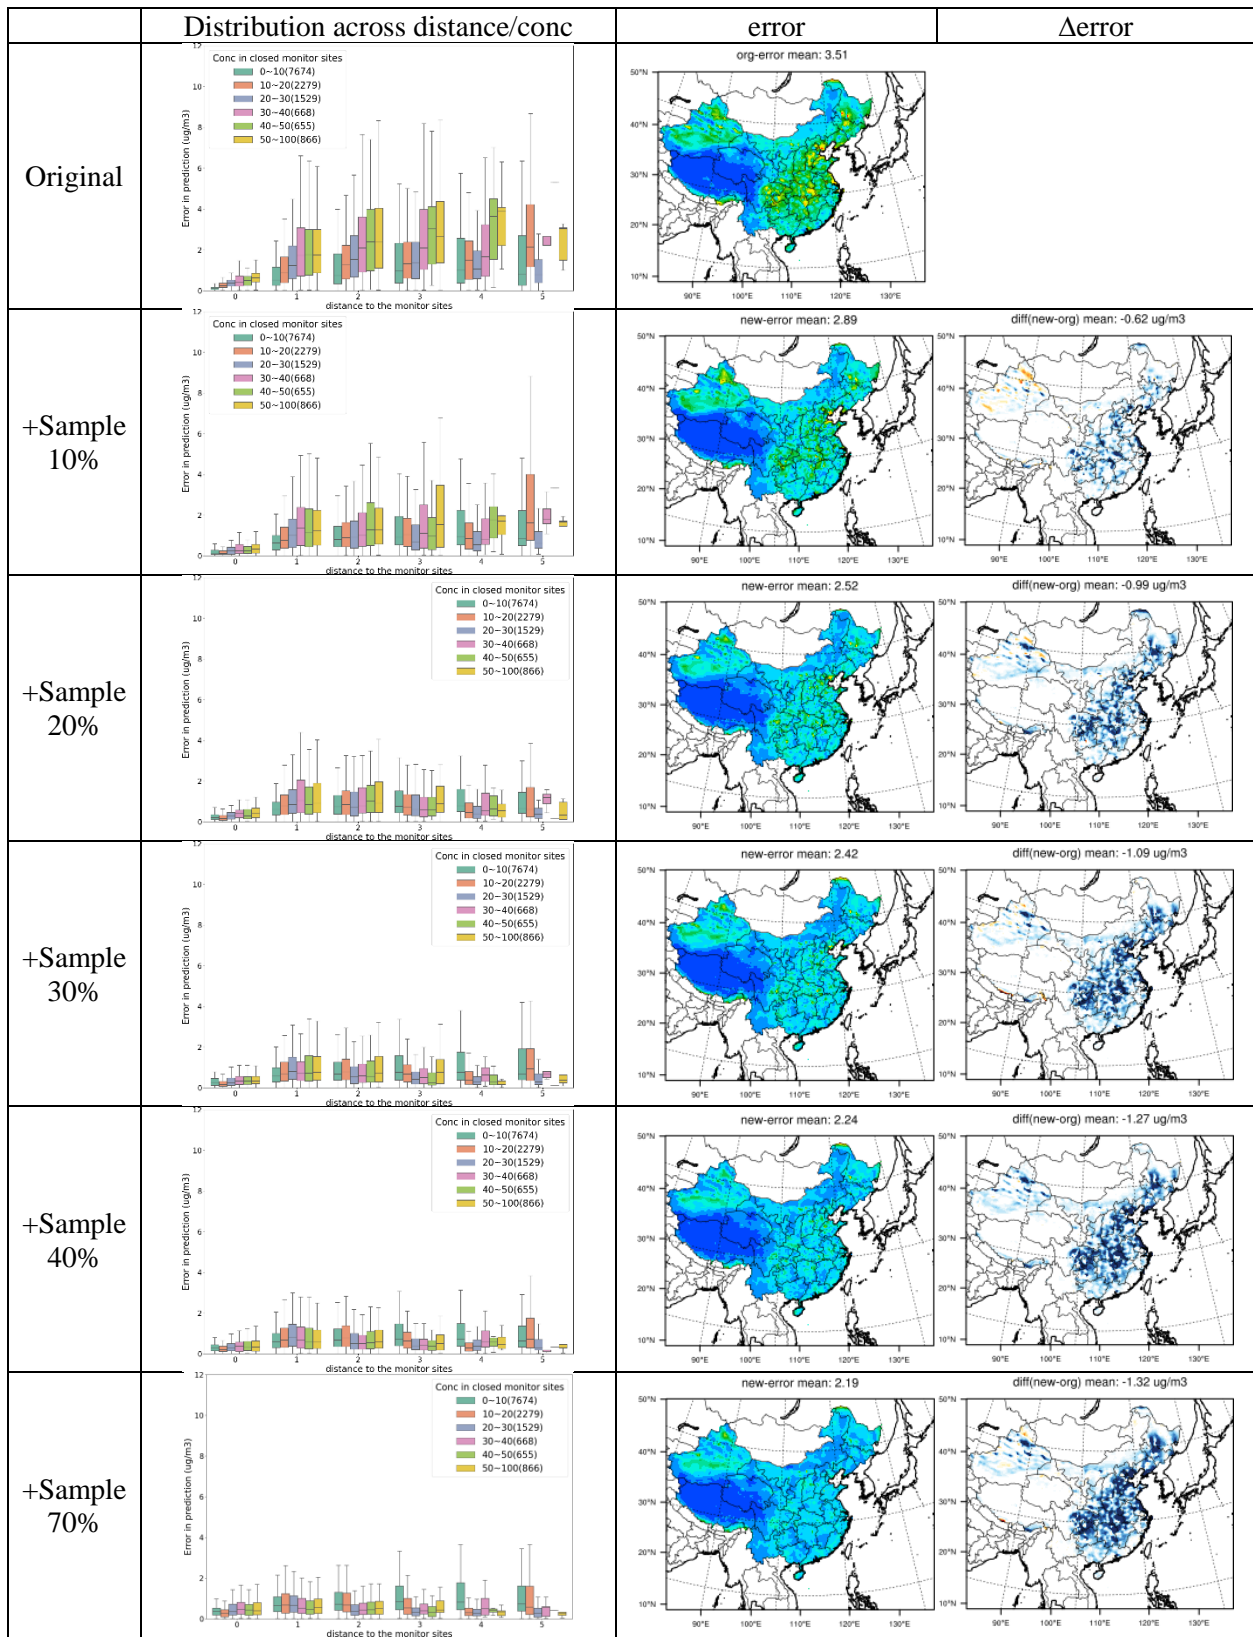

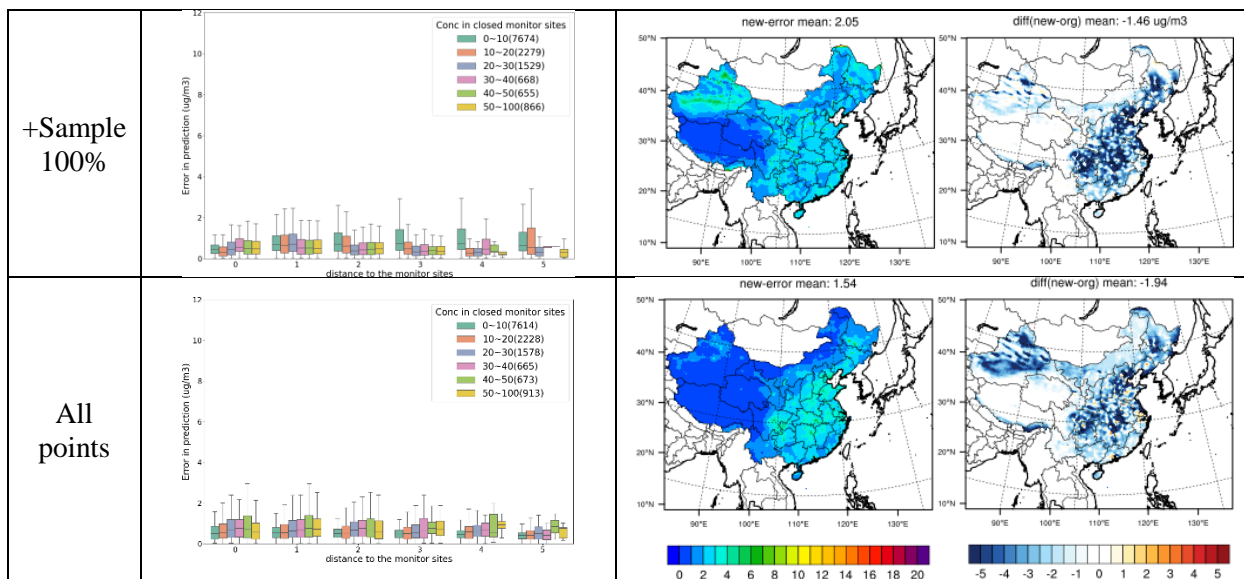

**Figure S8.** Improvement with selected adding sites with certain levels of sampling

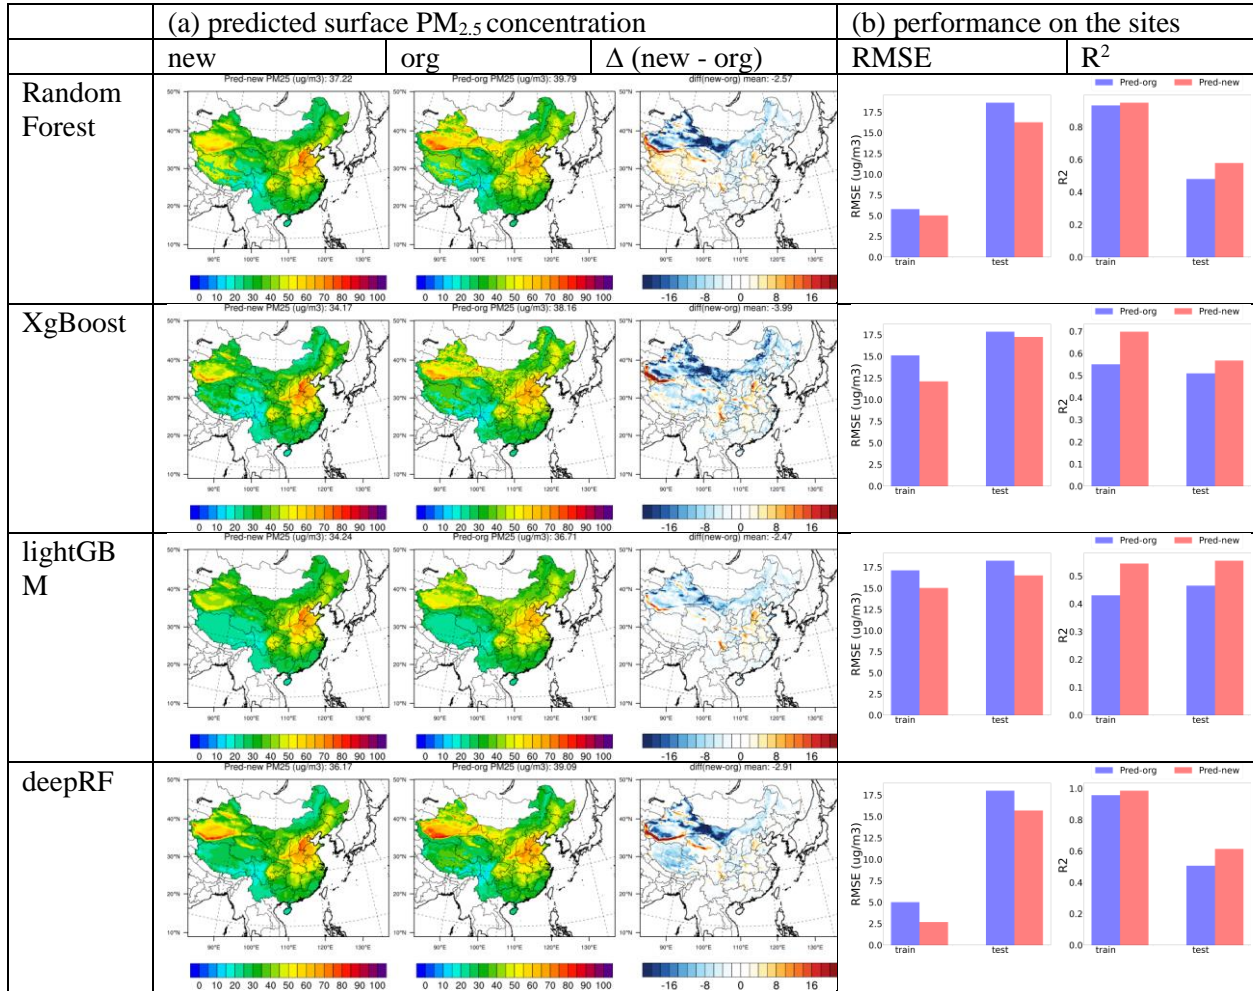

**Figure S9.** Improved performance with inclusion of spatiotemporal-neighbourhood features trained with real measurement dataset

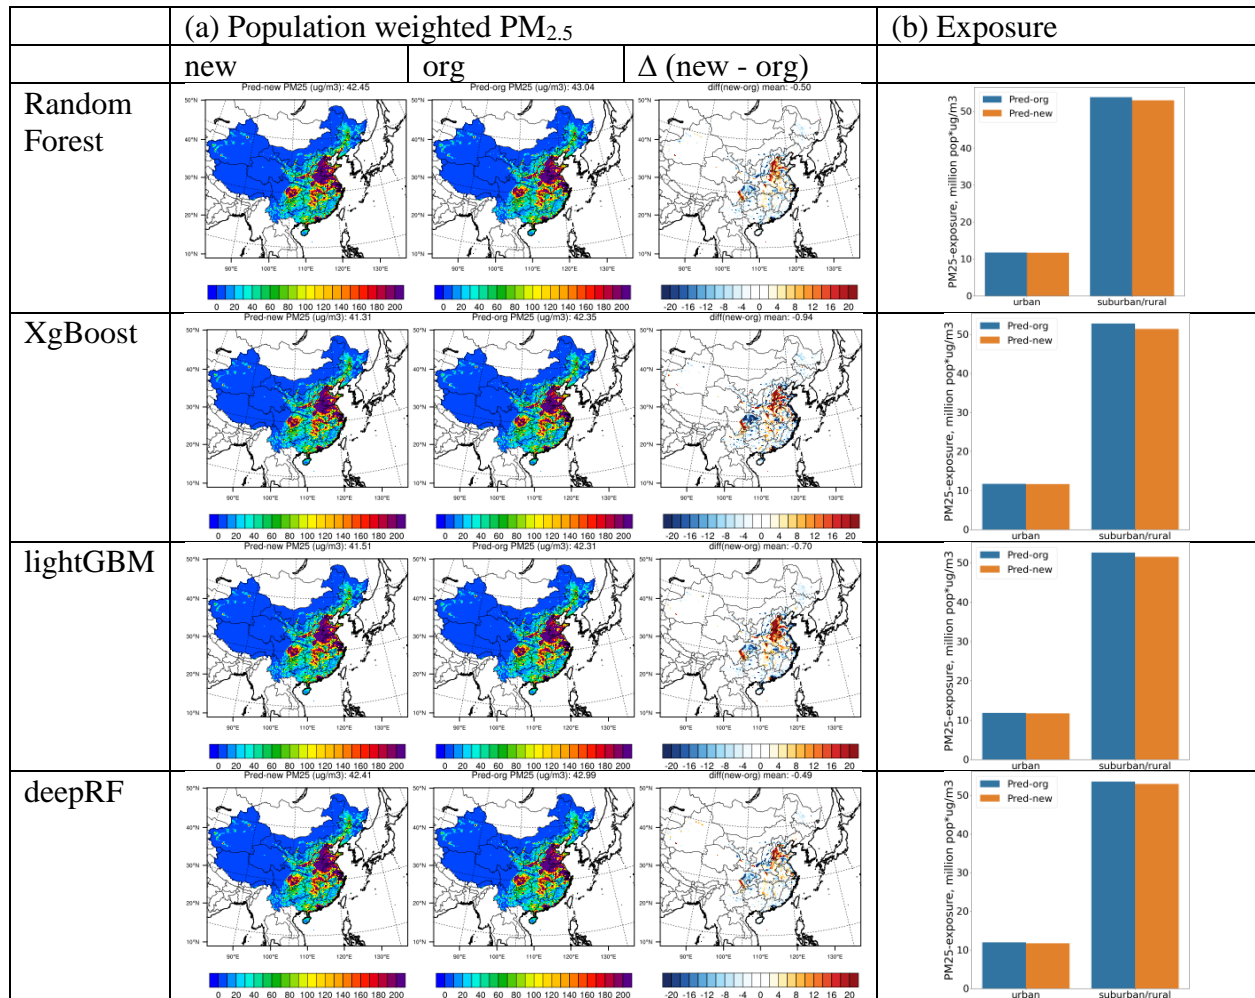

\*Note: within 5 grid cells

**Figure S10.** Uncertainties in estimation of PM<sub>2.5</sub>-related exposure across China

(a) performance in scenarios with adding points

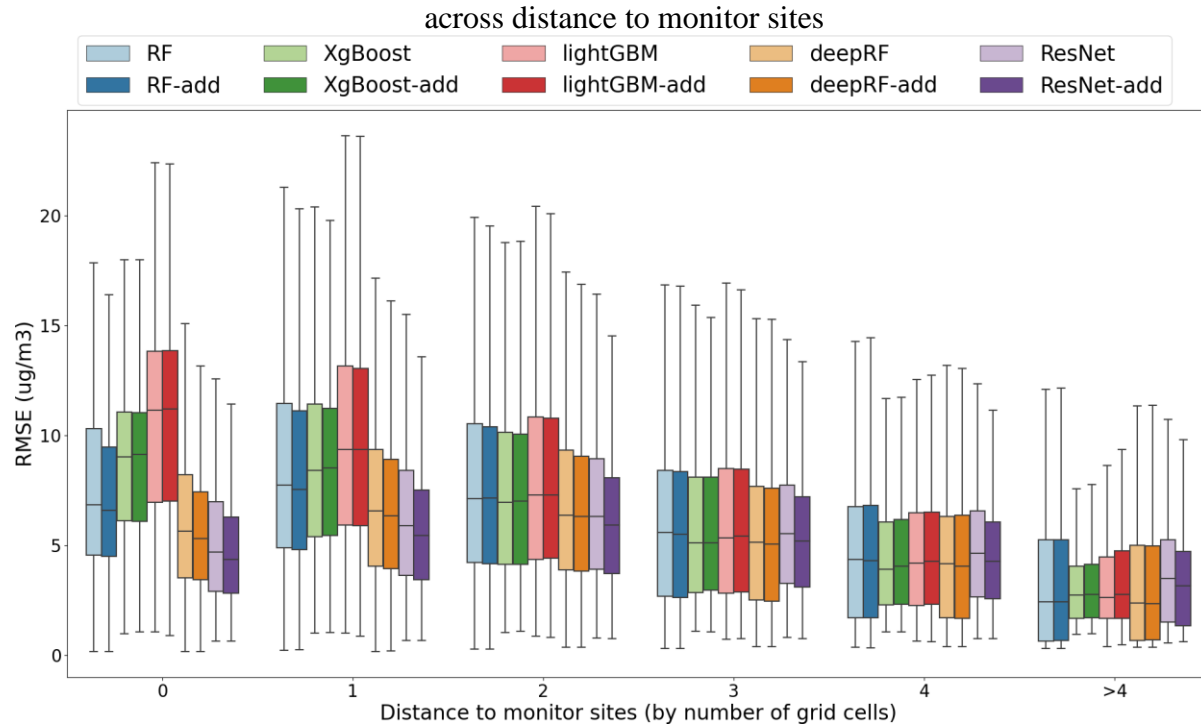

(b) +sample new sites during 2017-2021

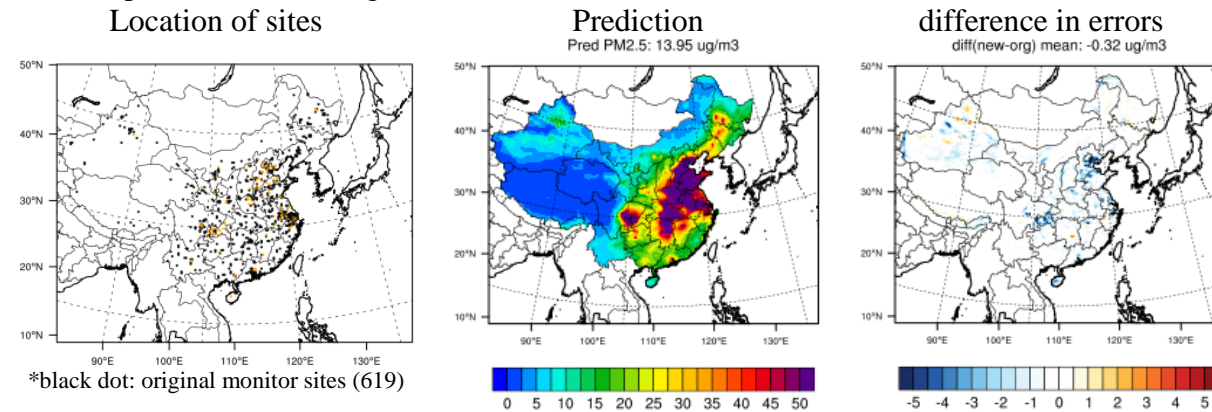

**Figure S11.** Improvement with the inclusion of new sites after 2017 in testing with CMAQ simulations



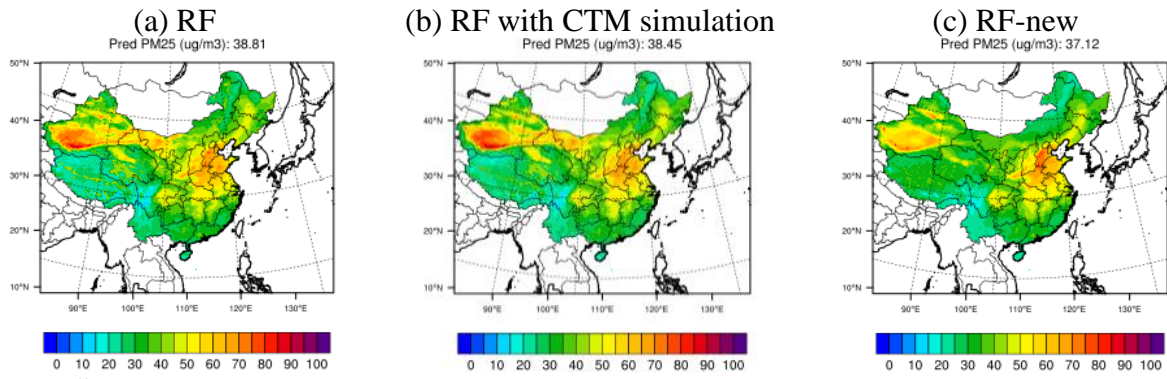

**Figure S12.** Comparison of predicted PM<sub>2.5</sub> by adding simulation data and the proposed method in this study (2017 for example)

**Error in original RF**

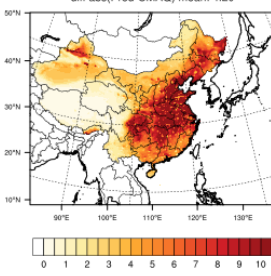

**Error in RF-noNO<sub>2</sub>**

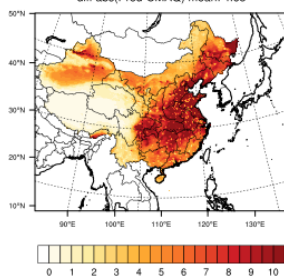

**Performance in training and testing dataset**

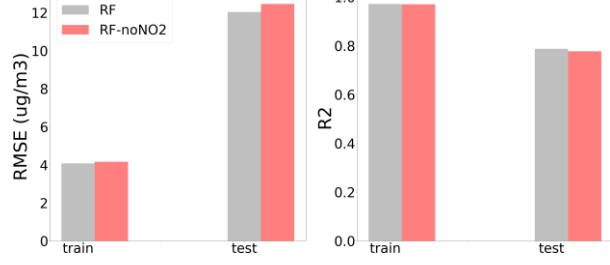

**Figure 13.** Comparison of model performance in predicting surface PM<sub>2.5</sub> without NO<sub>2</sub> column feature
